# Supplementary material for: Characterization of the Metabolic Requirements in Yeast Meiosis
Source: PubMed Central journal article supplement (PMC3650881; doi:10.1371/journal.pone.0063707), 2013-05-08

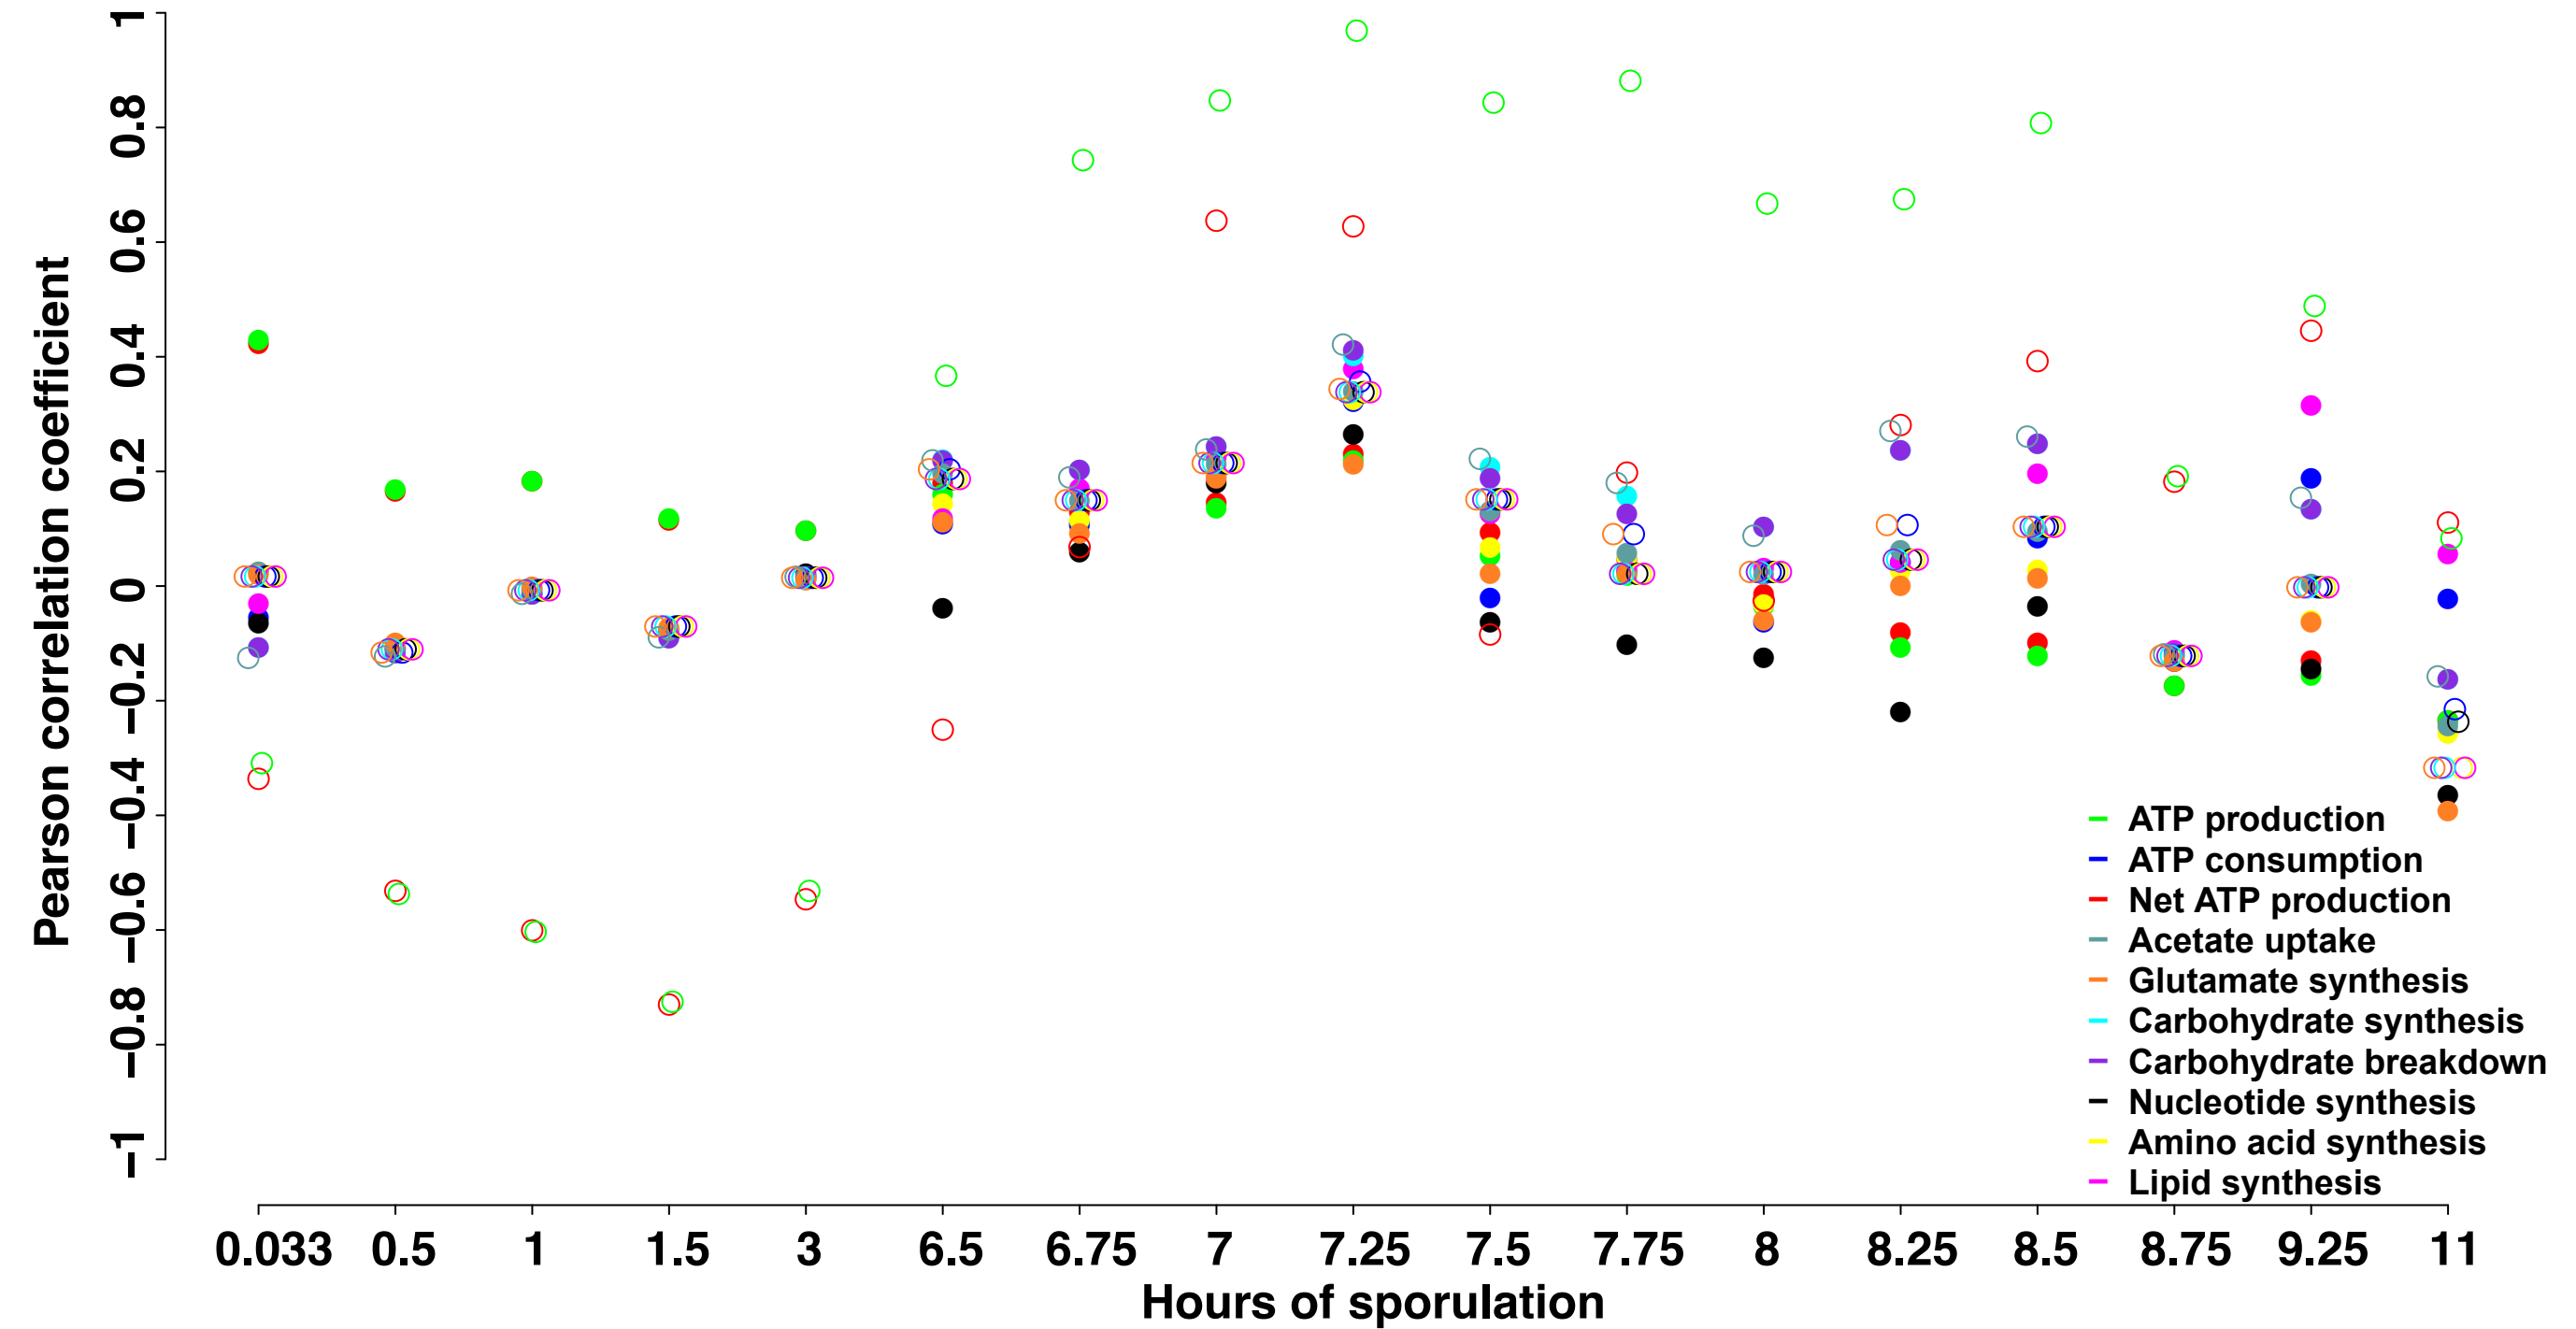

Supplement: pone.0063707.s005.pdf [file pone.0063707.s005.pdf]
