# Supplementary material for: Characterization of the Metabolic Requirements in Yeast Meiosis
Source: PubMed Central journal article supplement (PMC3650881; doi:10.1371/journal.pone.0063707), 2013-05-08
Supplement: pone.0063707.s007.pdf [file pone.0063707.s007.pdf]

**Table S1. Reactions in the yeast meiosis-specific metabolic network.**

| Reaction                                                                 | Metabolite <sup>&amp;</sup>             | Enzyme*     | Objective function <sup>^</sup>              | Pathway         | Reference |
|--------------------------------------------------------------------------|-----------------------------------------|-------------|----------------------------------------------|-----------------|-----------|
| <i>Reactions occurring in the cytoplasm</i>                              |                                         |             |                                              |                 |           |
| V1: Coenzyme A + Acetate + ATP => Acetyl-CoA + Pyrophosphate + AMP       | Acetate, Acetyl-CoA                     | <i>ACS2</i> | Net ATP production (-1), ATP consumption (1) |                 | [1,2]     |
| V2: Oxaloacetate + Acetyl-CoA + H <sub>2</sub> O => Citrate + Coenzyme A | Oxaloacetate, Acetyl-CoA, Citrate       | <i>CIT2</i> |                                              |                 | [1,2,3,4] |
| V3: Citrate + H <sub>2</sub> O => Isocitrate                             | Citrate, Isocitrate                     | <i>ACO1</i> |                                              |                 | [1,2,3]   |
| V4: Isocitrate => Glyoxylate + Succinate                                 | Isocitrate, Glyoxylate, Succinate       | <i>ICL1</i> |                                              | Glyoxylate      | [1,2,3]   |
| V5: Glyoxylate + Acetyl-CoA => Malate                                    | Glyoxylate, Acetyl-CoA, Malate          | <i>MLS1</i> |                                              | Glyoxylate      | [1,2,3]   |
| V6: Malate + NAD => Oxaloacetate + NADH + H <sup>+</sup>                 | Malate, Oxaloacetate                    | <i>MDH2</i> | Net ATP production (3), ATP production (3)   |                 | [1,2,3]   |
| V7: Oxaloacetate + GTP => CO <sub>2</sub> + Phosphoenolpyruvate + GDP    | Oxaloacetate, Phosphoenolpyruvate       | <i>PCK1</i> | Net ATP production (-1), ATP consumption (1) | Gluconeogenesis | [2,5]     |
| V8: Phosphoenolpyruvate + H <sub>2</sub> O => 2-Phosphoglycerate         | Phosphoenolpyruvate, 2-Phosphoglycerate | <i>ENO1</i> |                                              | Gluconeogenesis | [2,3]     |
| V9: 2-Phosphoglycerate => 3-Phosphoglycerate                             | 2-Phosphoglycerate, 3-Phosphoglycerate  | <i>GPM1</i> |                                              | Gluconeogenesis | [2,3]     |
| V10: 3-Phosphoglycerate + ATP => 1,3-BIP Glycerate + ADP                 | 3-Phosphoglycerate, 1,3-BIP Glycerate   | <i>PGK1</i> | Net ATP production (-1), ATP consumption     | Gluconeogenesis | [2,3,5]   |

|                                                                                            |                                                                                    | (1)                                                               |                                              |                            |
|--------------------------------------------------------------------------------------------|------------------------------------------------------------------------------------|-------------------------------------------------------------------|----------------------------------------------|----------------------------|
| V11: 1,3-BIP Glycerate + NADH + H+ => Glyceraldehyde-3-Phosphate + phosphate + NAD         | 1,3-BIP Glycerate, Glyceraldehyde-3-Phosphate                                      | <i>TDH1</i><br><i>TDH2</i><br><i>TDH3</i><br>(or)                 | Net ATP production (-3), ATP consumption (3) | Gluconeogenesis [2,3,6]    |
| V12: Glyceraldehyde-3-Phosphate => Dihydroxy-acetone-phosphate                             | Glyceraldehyde-3-Phosphate, Dihydroxy-acetone-phosphate                            | <i>TPI1</i>                                                       |                                              | Gluconeogenesis [2,3,6]    |
| V13: Dihydroxy-Acetone-phosphate + Glyceraldehyde-3-phosphate => Fructose-1,6-bisphosphate | Dihydroxy-Acetone-phosphate, Glyceraldehyde-3-phosphate, Fructose-1,6-bisphosphate | <i>FBA1</i>                                                       |                                              | Gluconeogenesis [2,3,6]    |
| V14: Fructose-1,6-bisphosphate + H2O => Fructose-6-phosphate + phosphate                   | Fructose-1,6-bisphosphate, Fructose-6-phosphate                                    | <i>FBP1</i>                                                       |                                              | Gluconeogenesis [2,3,6]    |
| V15: Fructose-6-phosphate => Glucose-6-phosphate                                           | Fructose-6-phosphate, Glucose-6-phosphate                                          | <i>PGI1</i>                                                       |                                              | Gluconeogenesis [2,3,6]    |
| V16: Glucose-6-phosphate => Glucose-1-phosphate                                            | Glucose-6-phosphate, Glucose-1-phosphate                                           | <i>PGM2</i>                                                       |                                              | Gluconeogenesis [2,3]      |
| V17: UDP-D-glucose + Glucose-6-phosphate => UDP + $\alpha,\alpha$ -trehalose 6-phosphate   | Glucose-6-phosphate                                                                | <i>TPS1</i><br><i>TPS2</i><br><i>TPS3</i><br><i>TLS1</i><br>(and) | Carbohydrate synthesis                       | Gluconeogenesis [2,7,8]    |
| $\alpha,\alpha$ -trehalose 6-phosphate + H2O => Trehalose + phosphate                      |                                                                                    |                                                                   |                                              |                            |
| V18: Glucose-1-phosphate + UTP => UDP-Glucose + 2 Pi                                       | Glucose-1-phosphate                                                                | <i>UGPI</i>                                                       | Carbohydrate synthesis                       | Gluconeogenesis [2,8,9,10] |
| Glycogen <sub>(n residues)</sub> + UDP-Glucose => Glycogen <sub>(n+1 residues)</sub> + UDP |                                                                                    |                                                                   |                                              |                            |
| V19: a Glycogen + Phosphate => a Glycogen + Glucose-1-phosphate                            | Glucose-1-phosphate                                                                | <i>GPH1</i>                                                       | Carbohydrate breakdown                       | Glycogenolysis [2,11,12]   |

|                                                                                                             |                                                                                                     |                                                   |                                                              |                |         |
|-------------------------------------------------------------------------------------------------------------|-----------------------------------------------------------------------------------------------------|---------------------------------------------------|--------------------------------------------------------------|----------------|---------|
| V20: Glucose-1-phosphate<br>=> Glucose-6-phosphate                                                          | Glucose-1-phosphate,<br>Glucose-6-phosphate                                                         | <i>PGM2</i>                                       |                                                              | Glycogenolysis | [1,2,3] |
| V21: Glucose-6-phosphate<br>=> Fructose-6-phosphate                                                         | Glucose-6-phosphate,<br>Fructose-6-phosphate                                                        | <i>PGII</i>                                       |                                                              | Glycogenolysis | [2,3,6] |
| V22: Fructose-6-phosphate<br>+ATP => Fructose-1,6-<br>biphosphate + ADP + H <sup>+</sup>                    | Fructose-6-phosphate ,<br>Fructose-1,6-<br>biphosphate                                              | <i>PFK1</i><br><i>PFK2</i><br>(and)               | Net ATP<br>production (-<br>1),<br>ATP<br>consumption<br>(1) | Glycogenolysis | [2,3,6] |
| V23: Fructose-1,6-<br>biphosphate =><br>Dihydroxy-Acetone-<br>phosphate +<br>Glyceraldehyde-3-<br>phosphate | Fructose-1,6-<br>biphosphate,<br>Dihydroxy-Acetone-<br>phosphate,<br>Glyceraldehyde-3-<br>phosphate | <i>FBA1</i>                                       |                                                              | Glycogenolysis | [2,3,6] |
| V24: Dihydroxy-Acetone-<br>phosphate =><br>Glyceraldehyde-3-<br>phosphate                                   | Dihydroxy-Acetone-<br>phosphate,<br>Glyceraldehyde-3-<br>phosphate                                  | <i>TPI1</i>                                       |                                                              | Glycogenolysis | [2,3,6] |
| V25: Glyceraldehyde-3-<br>phosphate + Phosphate +<br>NAD => 1,3-BIP Glycerate<br>+ NADH + H <sup>+</sup>    | Glyceraldehyde-3-<br>phosphate,<br>1,3-BIP Glycerate                                                | <i>TDH1</i><br><i>TDH2</i><br><i>TDH3</i><br>(or) | Net ATP<br>production<br>(3),<br>ATP<br>production (3)       | Glycogenolysis | [2,3,6] |
| V26: 1,3-BIP Glycerate +<br>ADP => 3-<br>Phosphoglycerate + ATP                                             | 1,3-BIP Glycerate,<br>3-Phosphoglycerate                                                            | <i>PGK1</i>                                       | Net ATP<br>production<br>(1),<br>ATP<br>production (1)       | Glycogenolysis | [2,3,6] |
| V27: 3-Phosphoglycerate<br>=> 2-Phosphoglycerate                                                            | 3-Phosphoglycerate, 2-<br>Phosphoglycerate                                                          | <i>GPM1</i>                                       |                                                              | Glycogenolysis | [2,3,6] |
| V28: 2-Phosphoglycerate<br>=> Phosphoenolpyruvate +<br>H2O                                                  | 2-Phosphoglycerate,<br>Phosphoenolpyruvate                                                          | <i>ENO1</i>                                       |                                                              | Glycogenolysis | [2,3,6] |
| V29: Phosphoenolpyruvate<br>+ ADP + H <sup>+</sup> => Pyruvate +<br>ATP                                     | Phosphoenolpyruvate,<br>Pyruvate                                                                    | <i>PYK2</i>                                       | Net ATP<br>production<br>(1),<br>ATP<br>production (1)       | Glycogenolysis | [2,3,6] |

|                                                                                                       |                                               |                                                    |                                                                   |                |           |
|-------------------------------------------------------------------------------------------------------|-----------------------------------------------|----------------------------------------------------|-------------------------------------------------------------------|----------------|-----------|
| V30: HCO <sub>3</sub> <sup>-</sup> + Pyruvate + ATP => Phosphate + Oxaloacetate + ADP                 | Pyruvate, Oxaloacetate                        | <i>PYC1</i><br><i>PYC2</i><br>(or)                 | Net ATP production (-1), ATP consumption (1)                      | Glycogenolysis | [1,2]     |
| V31: Fumarate + H <sub>2</sub> O => Malate                                                            | Fumarate, Malate                              | <i>FUM1</i>                                        |                                                                   |                | [2,3,5]   |
| V32: Isocitrate + NADP => Oxoglutarate + CO <sub>2</sub> + NADPH                                      | Isocitrate, Oxoglutarate                      | <i>IDP2</i>                                        | Net ATP production (3), ATP production (3)                        | Glutamate      | [2,3]     |
| V33: Oxoglutarate + NH <sub>3</sub> + NADPH + H <sup>+</sup> => L-Glutamate + H <sub>2</sub> O + NADP | Oxoglutarate                                  | <i>GDH3</i>                                        | Net ATP production (-3), ATP consumption (3), Glutamate synthesis | Glutamate      | [2,3,8]   |
| <b>Reactions occurring in the mitochondria</b>                                                        |                                               |                                                    |                                                                   |                |           |
| V34: Coenzyme A [m] + NAD + Pyruvate [m] => Acetyl-CoA [m] + CO <sub>2</sub> + NADH                   | Pyruvate [m], Acetyl-CoA [m]                  | <i>PDB1</i><br><i>PDA1</i><br>(and)                |                                                                   | Glycogenolysis | [2,3,6]   |
| V35: Oxaloacetate [m] + Acetyl-CoA [m] + H <sub>2</sub> O => Citrate [m] + Coenzyme A [m]             | Oxaloacetate [m], Acetyl-CoA [m], Citrate [m] | <i>CIT1</i>                                        |                                                                   | TCA            | [1,2,3,4] |
| V36: Citrate [m] + H <sub>2</sub> O => Isocitrate [m]                                                 | Citrate [m], Isocitrate [m]                   | <i>ACO1</i>                                        |                                                                   | TCA            | [1,2,3]   |
| V37: NAD + Isocitrate [m] => Oxoglutarate [m] + NADH + CO <sub>2</sub>                                | Isocitrate [m], Oxoglutarate [m]              | <i>IDH1</i><br><i>IDH2</i><br>(and)                | Net ATP production (3), ATP production (3)                        | TCA            | [1,2,3]   |
| V38: Oxoglutarate [m] + Coenzyme A [m] + NAD => Succinyl-CoA [m] + CO <sub>2</sub> + NADH             | Oxoglutarate [m], Succinyl-CoA [m]            | <i>LPD1</i><br><i>KGD1</i><br><i>KGD2</i><br>(and) | Net ATP production (3), ATP                                       | TCA            | [2,3,5]   |

|                                                                                  |                                                  |                                                                   |                                            |                |           |
|----------------------------------------------------------------------------------|--------------------------------------------------|-------------------------------------------------------------------|--------------------------------------------|----------------|-----------|
|                                                                                  |                                                  |                                                                   |                                            | production (3) |           |
| V39: Succinyl-CoA [m] + GDP + Phosphate <=> Succinate [m] + Coenzyme A [m] + GTP | Succinyl-CoA [m], Succinate [m]                  | <i>LSC1</i><br><i>LSC2</i><br>(and)                               | Net ATP production (1), ATP production (1) | TCA            | [2,3,5]   |
| V40: Succinate [m] + FAD => Fumarate [m] + FADH2                                 | Succinate [m], Fumarate [m]                      | <i>SDH1</i><br><i>SDH2</i><br><i>SDH3</i><br><i>SDH4</i><br>(and) | Net ATP production (2), ATP production (2) | TCA            | [1,2,3]   |
| V41: Fumarate [m] + H2O => Malate [m]                                            | Fumarate [m], Malate [m]                         | <i>FUM1</i>                                                       |                                            | TCA            | [1,2,3]   |
| V42: Malate [m] + NAD => Oxaloacetate [m] + NADH + H <sup>+</sup>                | Malate [m], Oxaloacetate [m]                     | <i>MDH1</i>                                                       | Net ATP production (3), ATP production (3) | TCA            | [1,2,3]   |
| <b><i>Transport reactions</i></b>                                                |                                                  |                                                                   |                                            |                |           |
| V43: Acetate [e] => Acetate                                                      | Acetate                                          | <i>ADY2</i>                                                       | Acetate uptake                             |                | [2,13,14] |
| V44: Acetyl-CoA + Carnitine => CoA + O-Acetylcarnitine                           | Acetyl-CoA, Acetyl-CoA [m]                       | <i>CAT2</i><br><i>YAT1</i><br><i>YAT2</i><br>(avg)                |                                            |                | [2,15]    |
| O-Acetylcarnitine + CoA => Acetyl-CoA [m] + Carnitine <sup>s</sup>               |                                                  |                                                                   |                                            |                |           |
| V45: Oxaloacetate [m] => Oxaloacetate                                            | Oxaloacetate [m], Oxaloacetate                   | <i>OAC1</i>                                                       |                                            |                | [2,16,17] |
| V46: Oxaloacetate => Oxaloacetate [m]                                            | Oxaloacetate, Oxaloacetate [m]                   | <i>OAC1</i>                                                       |                                            |                | [2,16,17] |
| V47: Citrate => Citrate [m]                                                      | Citrate, Citrate [m]                             | <i>CTP1</i>                                                       |                                            |                | [2,18]    |
| V48: Isocitrate [m] => Isocitrate                                                | Isocitrate, Isocitrate [m]                       | <i>CTP1</i>                                                       |                                            |                | [2,18]    |
| V49: Fumarate [m] + Succinate => Fumarate + Succinate [m] <sup>#</sup>           | Fumarate [m], Succinate, Fumarate, Succinate [m] | <i>SFC1</i>                                                       |                                            |                | [2,17,19] |

|                                                                                                                                                 |                                   |                                     |                                                                  |                |           |
|-------------------------------------------------------------------------------------------------------------------------------------------------|-----------------------------------|-------------------------------------|------------------------------------------------------------------|----------------|-----------|
| V50: Succinate + Phosphate [m] => Succinate [m] + Phosphate                                                                                     | Succinate [m],<br>Succinate       | <i>DIC1</i>                         |                                                                  |                | [2,17,19] |
| V51: Oxoglutarate [m] => Oxoglutarate                                                                                                           | Oxoglutarate [m],<br>Oxoglutarate | <i>ODC1</i>                         |                                                                  | Glutamate      | [2,20]    |
| V52: Pyruvate => Pyruvate [m]                                                                                                                   | Pyruvate, Pyruvate [m]            | <i>YIA6</i>                         |                                                                  | Glycogenolysis | [2,21,22] |
| <b>Reactions that produce nucleotides, amino acids, and lipids</b>                                                                              |                                   |                                     |                                                                  |                |           |
| V53: Glucose-6-phosphate + NADP => D-6-phosphoglucono-δ-lactone + NADPH + H <sup>+</sup>                                                        | Glucose-6-phosphate               | <i>ZWF1</i>                         | Net ATP production (3), ATP production (3), Nucleotide synthesis | Nucleotide     | [2,23,24] |
| V54: 3-Phosphoglycerate + NAD <sup>+</sup> => 3-Phosphohydroxypyruvate + H + NADH                                                               | 3-Phosphoglycerate                | <i>SER3</i><br><i>SER33</i><br>(or) | Net ATP production (3), ATP production (3), Amino acid synthesis | Amino acid     | [2,23,24] |
| V55: Oxaloacetate + L-glutamate => 2-oxoglutarate + L-aspartate                                                                                 | Oxaloacetate                      | <i>AAT2</i>                         | Amino acid synthesis                                             | Amino acid     | [2,23,24] |
| V56: Pyruvate [m] + NADPH + H <sup>+</sup> + glutamate => CO <sub>2</sub> + NADP <sup>+</sup> + H <sub>2</sub> O + Alpha-ketoglutarate + valine | Pyruvate [m]                      | <i>ILV2</i><br><i>ILV6</i><br>(and) | Amino acid synthesis                                             | Amino acid     | [2,23,24] |
| V57: Oxaloacetate [m] + L-Glutamate => 2-Oxoglutarate + L-Aspartate                                                                             | Oxaloacetate [m]                  | <i>AAT1</i>                         | Amino acid synthesis                                             | Amino acid     | [2,23,24] |
| V58: Phosphoenolpyruvate + Skm5p => 3Psm + phosphate                                                                                            | Phosphoenolpyruvate               | <i>ARO1</i>                         | Amino acid synthesis                                             | Amino acid     | [2,23,24] |
| V59: BCCP-biotin-CO <sub>2</sub> + Acetyl-CoA + ATP => Malonyl-CoA + BCCP-                                                                      | Acetyl-CoA                        | <i>ACC1</i>                         | Net ATP production (-1),                                         | Lipid          | [2,23,24] |

|                                                                                                        |                             |             |                                                               |       |           |
|--------------------------------------------------------------------------------------------------------|-----------------------------|-------------|---------------------------------------------------------------|-------|-----------|
| biotin + phosphate + ADP                                                                               |                             |             | ATP consumption (1), Lipid synthesis                          |       |           |
| V60: BCCP-biotin-CO <sub>2</sub> + Acetyl-CoA [m] + ATP => Malonyl-CoA + BCCP-biotin + phosphate + ADP | Acetyl-CoA [m]              | <i>HFAI</i> | Net ATP production (-1), ATP consumption (1), Lipid synthesis | Lipid | [2,23,24] |
| V61: Dihydroxy-Acetone-phosphate + NADH => Glycerol 3 P + NAD                                          | Dihydroxy-Acetone-phosphate | <i>GPD1</i> | Net ATP production (-3), ATP consumption (3), Lipid synthesis | Lipid | [2,23,24] |
| V62: Glucose-6-phosphate => Mi1p-D                                                                     | Glucose-6-phosphate         | <i>INO1</i> | Lipid synthesis                                               | Lipid | [2,24]    |

<sup>&</sup> All metabolites are located in the cytoplasm except those labeled with [m] (mitochondrial metabolites) or [e] (extracellular metabolites).

\* The “and” logic implies protein complexes or multi-subunit proteins where each enzyme is required to catalyze a reaction; the minimum expression value of all enzymes is used to define the upper bound of reaction constraints. The “or” logic implies isozymes where each enzyme can individually catalyze a reaction; the maximum expression value of all enzymes is used to define the upper bound of reaction constraints.

^ Each objective function is defined by  $C^T V$ , where  $V$  is a vector of reaction fluxes and  $C$  is a vector of zeros with a value of one at the position of reactions of interest, as stated in the column. The exceptions are three ATP objectives: positive numbers of yielded ATPs are coefficients for reactions participating in ATP production, positive numbers of used ATPs are coefficient for reactions participating in ATP consumption, and positive numbers of yielded ATPs and negative numbers of used ATPs are entered as coefficients for the objective function of net ATP production. The ATP coefficients are in parentheses immediately following the name of the ATP-related objective functions. Other energy molecules are converted to the ATP unit: 1NADH=3ATP, 1NADPH=3ATP, 1FADH<sub>2</sub>=2ATP, 1GTP=1ATP.

<sup>§</sup> This reaction represents three independent reactions catalyzed by three enzymes, thus the average expression value of the three enzymes is used to define the upper bound of reaction constraints [15].

<sup>#</sup> The flux of this reaction is set to 0 because *SFC1* encodes an antiporter, which transports cytoplasmic succinate into mitochondria in exchange for fumarate [19].

## REFERENCES

1. Wang Q, Zhang Y, Yang C, Xiong H, Lin Y, et al. (2010) Acetylation of metabolic enzymes coordinates carbon source utilization and metabolic flux. *Science* 327: 1004-1007.
2. Engel SR, Balakrishnan R, Binkley G, Christie KR, Costanzo MC, et al. (2010) *Saccharomyces* Genome Database provides mutant phenotype data. *Nucleic Acids Res* 38: D433-436.
3. Kanehisa M, Goto S, Furumichi M, Tanabe M, Hirakawa M (2010) KEGG for representation and analysis of molecular networks involving diseases and drugs. *Nucleic Acids Res* 38: D355-360.
4. Kim KS, Rosenkrantz MS, Guarente L (1986) *Saccharomyces cerevisiae* contains two functional citrate synthase genes. *Mol Cell Biol* 6: 1936-1942.
5. Blank LM, Kuepfer L, Sauer U (2005) Large-scale <sup>13</sup>C-flux analysis reveals mechanistic principles of metabolic network robustness to null mutations in yeast. *Genome Biol* 6: R49.
6. Zhao S, Xu W, Jiang W, Yu W, Lin Y, et al. (2010) Regulation of cellular metabolism by protein lysine acetylation. *Science* 327: 1000-1004.
7. Vandercammen A, Francois J, Hers HG (1989) Characterization of trehalose-6-phosphate synthase and trehalose-6-phosphate phosphatase of *Saccharomyces cerevisiae*. *Eur J Biochem* 182: 613-620.
8. Walker GM (1998) *Yeast physiology and biotechnology*. West Sussex: John Wiley & Sons Ltd.
9. Cheng C, Mu J, Farkas I, Huang D, Goebel MG, et al. (1995) Requirement of the self-glucosylating initiator proteins Glg1p and Glg2p for glycogen accumulation in *Saccharomyces cerevisiae*. *Mol Cell Biol* 15: 6632-6640.
10. Daran JM, Dallies N, Thines-Sempoux D, Paquet V, Francois J (1995) Genetic and biochemical characterization of the UGP1 gene encoding the UDP-glucose pyrophosphorylase from *Saccharomyces cerevisiae*. *Eur J Biochem* 233: 520-530.
11. Rath VL, Hwang PK, Fletterick RJ (1992) Purification and crystallization of glycogen phosphorylase from *Saccharomyces cerevisiae*. *J Mol Biol* 225: 1027-1034.
12. Hwang PK, Tugendreich S, Fletterick RJ (1989) Molecular analysis of GPH1, the gene encoding glycogen phosphorylase in *Saccharomyces cerevisiae*. *Mol Cell Biol* 9: 1659-1666.
13. Casal M, Cardoso H, Leao C (1996) Mechanisms regulating the transport of acetic acid in *Saccharomyces cerevisiae*. *Microbiology* 142 ( Pt 6): 1385-1390.
14. Paiva S, Devaux F, Barbosa S, Jacq C, Casal M (2004) Ady2p is essential for the acetate permease activity in the yeast *Saccharomyces cerevisiae*. *Yeast* 21: 201-210.
15. Swiegers JH, Dippenaar N, Pretorius IS, Bauer FF (2001) Carnitine-dependent metabolic activities in *Saccharomyces cerevisiae*: three carnitine acetyltransferases are essential in a carnitine-dependent strain. *Yeast* 18: 585-595.
16. Palmieri L, Vozza A, Agrimi G, De Marco V, Runswick MJ, et al. (1999) Identification of the yeast mitochondrial transporter for oxaloacetate and sulfate. *J Biol Chem* 274: 22184-22190.
17. Palmieri L, Lasorsa FM, Vozza A, Agrimi G, Fiermonte G, et al. (2000) Identification and functions of new transporters in yeast mitochondria. *Biochim Biophys Acta* 1459: 363-369.
18. Kaplan RS, Mayor JA, Gremse DA, Wood DO (1995) High level expression and characterization of the mitochondrial citrate transport protein from the yeast *Saccharomyces cerevisiae*. *J Biol Chem* 270: 4108-4114.
19. Palmieri L, Lasorsa FM, De Palma A, Palmieri F, Runswick MJ, et al. (1997) Identification of the yeast ACR1 gene product as a succinate-fumarate transporter essential for growth on ethanol or acetate. *FEBS Lett* 417: 114-118.
20. Palmieri L, Agrimi G, Runswick MJ, Fearnley IM, Palmieri F, et al. (2001) Identification in *Saccharomyces cerevisiae* of two isoforms of a novel mitochondrial transporter for 2-oxoadipate and 2-oxoglutarate. *J Biol Chem* 276: 1916-1922.



21. Hildyard JC, Halestrap AP (2003) Identification of the mitochondrial pyruvate carrier in *Saccharomyces cerevisiae*. *Biochem J* 374: 607-611.
22. Sugden MC, Holness MJ (2003) Trials, tribulations and finally, a transporter: the identification of the mitochondrial pyruvate transporter. *Biochem J* 374: e1-2.
23. Cortassa S, Aon JC, Aon MA (1995) Fluxes of carbon, phosphorylation, and redox intermediates during growth of *saccharomyces cerevisiae* on different carbon sources. *Biotechnol Bioeng* 47: 193-208.
24. Nelson DL, Cox MM (2008) *Lehninger Principles of Biochemistry*: Freeman, W. H. & Company
