# Supplementary material for: Characterization of the Metabolic Requirements in Yeast Meiosis
Source: PubMed Central journal article supplement (PMC3650881; doi:10.1371/journal.pone.0063707), 2013-05-08
Supplement: pone.0063707.s009.pdf [file pone.0063707.s009.pdf]

**Table S3. Biochemical data on metabolic pathways and macromolecule syntheses during yeast meiosis<sup>&</sup>.**

| Hours                                                                                                                                                                                                                                        | Scaled SK1 hours | Measurements | Activities | Scaled activities |
|----------------------------------------------------------------------------------------------------------------------------------------------------------------------------------------------------------------------------------------------|------------------|--------------|------------|-------------------|
| <b>Glutamate formation:</b> the proportion of 1,2,3,4- <sup>13</sup> C-labeled glutamate is measured by NMR spectroscopy (Figure 4 of [1]). The S41 strain reaches the steady state level of ascus formation in 36 hours (Figure 4B of [2]). |                  |              |            |                   |
| 0                                                                                                                                                                                                                                            | 0                | 0            | 0          | 0                 |
| 1                                                                                                                                                                                                                                            | 0.33             | 10           | 10         | 1                 |
| 2                                                                                                                                                                                                                                            | 0.67             | 20           | 10         | 1                 |
| 4                                                                                                                                                                                                                                            | 1.33             | 30           | 10         | 1                 |
| 8                                                                                                                                                                                                                                            | 2.66             | 33           | 3          | 0.3               |
| <b>TCA cycle:</b> the percentage of oxygen consumed per minute is measured by an oxygen monitor (Figure 1 of [3]). The AP1 strain reaches the steady state level of ascus formation in 24 hours (Figure 1 of [3]).                           |                  |              |            |                   |
| 0                                                                                                                                                                                                                                            | 0                | 20           | 20         | 0.8               |
| 2                                                                                                                                                                                                                                            | 1                | 25           | 25         | 1                 |
| 4                                                                                                                                                                                                                                            | 2                | 20           | 20         | 0.8               |
| 6                                                                                                                                                                                                                                            | 3                | 15           | 15         | 0.6               |
| 8                                                                                                                                                                                                                                            | 4                | 10           | 10         | 0.4               |
| 10                                                                                                                                                                                                                                           | 5                | 8            | 8          | 0.32              |
| 12                                                                                                                                                                                                                                           | 6                | 6            | 6          | 0.24              |
| 14                                                                                                                                                                                                                                           | 7                | 4            | 4          | 0.16              |
| 16                                                                                                                                                                                                                                           | 8                | 3            | 3          | 0.12              |
| <b>Gluconeogenesis:</b> mg carbohydrate /10 <sup>8</sup> cells is measured by the anthrone procedure (Figure 2A of [4]). The SK1 strain reaches the steady state level of ascus formation in 12 hours (Figure 1 of [4]).                     |                  |              |            |                   |
| 0                                                                                                                                                                                                                                            | 0                | 0.4          | 0          | 0                 |
| 2                                                                                                                                                                                                                                            | 2                | 0.9          | 0.5        | 0.45              |
| 4                                                                                                                                                                                                                                            | 4                | 2            | 1.1        | 1                 |
| 6                                                                                                                                                                                                                                            | 6                | 2.2          | 0.2        | 0.18              |
| <b>Glycogenolysis:</b> glycogenolytic enzyme activity is measured (Figure 2 of [5]). The AP1 strain reaches the steady state level of ascus formation in 24 hours (Figure 2 of [5]).                                                         |                  |              |            |                   |
| 0                                                                                                                                                                                                                                            | 0                | 0            | 0          | 0                 |
| 4                                                                                                                                                                                                                                            | 2                | 0            | 0          | 0                 |
| 6                                                                                                                                                                                                                                            | 3                | 0            | 0          | 0                 |
| 8                                                                                                                                                                                                                                            | 4                | 8            | 8          | 0.15              |
| 9                                                                                                                                                                                                                                            | 4.5              | 12           | 12         | 0.23              |
| 10                                                                                                                                                                                                                                           | 5                | 18           | 18         | 0.34              |
| 12                                                                                                                                                                                                                                           | 6                | 22           | 22         | 0.42              |
| 14                                                                                                                                                                                                                                           | 7                | 40           | 40         | 0.75              |
| 16                                                                                                                                                                                                                                           | 8                | 50           | 50         | 0.94              |
| 18                                                                                                                                                                                                                                           | 9                | 52           | 52         | 0.98              |
| 20                                                                                                                                                                                                                                           | 10               | 53           | 53         | 1                 |
| 24                                                                                                                                                                                                                                           | 12               | 50           | 50         | 0.94              |
| <b>DNA:</b> percentage of DNA content is measured by the diaminobenzoic acid fluorimetric procedure (Figure 2A of [3]). The AP1 strain reaches the steady state level of ascus formation in 24 hours (Figure 1 of [3]).                      |                  |              |            |                   |
| 0                                                                                                                                                                                                                                            | 0                | 0            | 0          | 0                 |
| 1                                                                                                                                                                                                                                            | 0.5              | 5            | 5          | 0.25              |

|                                                                                                                                                                                                  |      |      |     |      |
|--------------------------------------------------------------------------------------------------------------------------------------------------------------------------------------------------|------|------|-----|------|
| 2                                                                                                                                                                                                | 1    | 9    | 4   | 0.2  |
| 3                                                                                                                                                                                                | 1.5  | 20   | 11  | 0.55 |
| 4                                                                                                                                                                                                | 2    | 40   | 20  | 1    |
| 5                                                                                                                                                                                                | 2.5  | 60   | 20  | 1    |
| 8                                                                                                                                                                                                | 4    | 80   | 20  | 1    |
| <b>RNA:</b> <sup>3</sup> H incorporated into RNA is measured (Figure 3A of [3]). The AP1 strain reaches the steady state level of ascus formation in 24 hours (Figure 1 of [3]).                 |      |      |     |      |
| 0                                                                                                                                                                                                | 0    | 40   | 40  | 0.29 |
| 0.5                                                                                                                                                                                              | 0.25 | 50   | 50  | 0.36 |
| 1.5                                                                                                                                                                                              | 0.75 | 65   | 65  | 0.46 |
| 2                                                                                                                                                                                                | 1    | 80   | 80  | 0.57 |
| 3                                                                                                                                                                                                | 1.5  | 135  | 135 | 0.96 |
| 4                                                                                                                                                                                                | 2    | 140  | 140 | 1    |
| 5                                                                                                                                                                                                | 2.5  | 120  | 120 | 0.86 |
| 6                                                                                                                                                                                                | 3    | 100  | 100 | 0.71 |
| 7                                                                                                                                                                                                | 3.5  | 90   | 90  | 0.64 |
| 8                                                                                                                                                                                                | 4    | 70   | 70  | 0.5  |
| 9                                                                                                                                                                                                | 4.5  | 60   | 60  | 0.43 |
| 10                                                                                                                                                                                               | 5    | 50   | 50  | 0.36 |
| 11                                                                                                                                                                                               | 5.5  | 40   | 40  | 0.29 |
| <b>Protein:</b> <sup>35</sup> S incorporated into protein is measured (Figure 3A of [3]). The AP1 strain reaches the steady state level of ascus formation in 24 hours (Figure 1 of [3]).        |      |      |     |      |
| 0                                                                                                                                                                                                | 0    | 90   | 90  | 0.56 |
| 1                                                                                                                                                                                                | 0.5  | 120  | 120 | 0.75 |
| 1.5                                                                                                                                                                                              | 0.75 | 150  | 150 | 0.94 |
| 2                                                                                                                                                                                                | 1    | 160  | 160 | 1    |
| 3                                                                                                                                                                                                | 1.5  | 155  | 155 | 0.97 |
| 3.5                                                                                                                                                                                              | 1.75 | 150  | 150 | 0.94 |
| 4                                                                                                                                                                                                | 2    | 120  | 120 | 0.75 |
| 4.5                                                                                                                                                                                              | 2.25 | 110  | 110 | 0.69 |
| 5                                                                                                                                                                                                | 2.5  | 90   | 90  | 0.56 |
| <b>Lipid:</b> <sup>14</sup> C-acetate incorporated into lipids is measured (Figure 2A of [6]). The Y-185 strain reaches the steady state level of ascus formation in 30 hours (Figure 1 of [6]). |      |      |     |      |
| 0                                                                                                                                                                                                | 0    | 0    | 0   | 0    |
| 2.5                                                                                                                                                                                              | 1    | 3    | 3   | 0.46 |
| 5                                                                                                                                                                                                | 2    | 5    | 2   | 0.31 |
| 6                                                                                                                                                                                                | 2.4  | 6.5  | 1.5 | 0.23 |
| 8                                                                                                                                                                                                | 3.2  | 11   | 4.5 | 0.69 |
| 10                                                                                                                                                                                               | 4    | 15.5 | 4.5 | 0.69 |
| 11                                                                                                                                                                                               | 4.4  | 16   | 0.5 | 0.08 |
| 12                                                                                                                                                                                               | 4.8  | 17   | 1   | 0.15 |
| 14                                                                                                                                                                                               | 5.6  | 18   | 1   | 0.15 |
| 19                                                                                                                                                                                               | 7.6  | 19   | 1   | 0.15 |
| 20                                                                                                                                                                                               | 8    | 20   | 1   | 0.15 |
| 22                                                                                                                                                                                               | 8.8  | 22.5 | 2.5 | 0.38 |
| 24                                                                                                                                                                                               | 9.6  | 29   | 6.5 | 1    |

30

12

33

4

0.62

---

& The scaled SK1 hours and the scaled activities are plotted in Figure 2.

## REFERENCES

1. Dickinson JR, Dawes IW, Boyd AS, Baxter RL (1983)  $^{13}\text{C}$  NMR studies of acetate metabolism during sporulation of *Saccharomyces cerevisiae*. *Proc Natl Acad Sci U S A* 80: 5847-5851.
2. Esposito MS, Esposito RE, Arnaud M, Halvorson HO (1969) Acetate utilization and macromolecular synthesis during sporulation of yeast. *J Bacteriol* 100: 180-186.
3. Hopper AK, Magee PT, Welch SK, Friedman M, Hall BD (1974) Macromolecule synthesis and breakdown in relation to sporulation and meiosis in yeast. *J Bacteriol* 119: 619-628.
4. Kane SM, Roth R (1974) Carbohydrate metabolism during ascospore development in yeast. *J Bacteriol* 118: 8-14.
5. Colonna WJ, Magee PT (1978) Glycogenolytic enzymes in sporulating yeast. *J Bacteriol* 134: 844-853.
6. Henry SA, Halvorson HO (1973) Lipid synthesis during sporulation of *Saccharomyces cerevisiae*. *J Bacteriol* 114: 1158-1163.
